# Supplementary material for: A novel computer-assisted tool for 3D imaging of programmed death-ligand 1 expression in immunofluorescence-stained and optically cleared breast cancer specimens
Source: Springer Nature journal article supplement (doi:10.1186/s12885-023-11748-8), 2024-01-24
Supplement: MOESM2 [file 26658192]

---

**Conditions for the Alexa Fluor 555 channel**Experimental conditions of imaging acquisition

|                                                |                                                                                                                                                                                                                                                                                                                                       |
|------------------------------------------------|---------------------------------------------------------------------------------------------------------------------------------------------------------------------------------------------------------------------------------------------------------------------------------------------------------------------------------------|
| Sensitivity (HV)                               | 370                                                                                                                                                                                                                                                                                                                                   |
| Gain                                           | 0                                                                                                                                                                                                                                                                                                                                     |
| Offset                                         | 1                                                                                                                                                                                                                                                                                                                                     |
| Experimental conditions of laser intensity (%) | Intensity in the upper layer (depth = 15 $\mu\text{m}$ )<br>= $8.0 - 0.0066 \times (\text{total thickness}/2 - 15 \mu\text{m})$<br>Intensity in the middle layer (total thickness /2) = 8.0<br>Intensity in the lower layer (latest depth = 15 $\mu\text{m}$ )<br>= $8.0 + 0.0166 \times (\text{total thickness}/2 + 15 \mu\text{m})$ |

---

**Conditions for the DiD channel**Experimental conditions of imaging acquisition

|                                                |                                                                                                                                                                                                                                                                                                                                      |
|------------------------------------------------|--------------------------------------------------------------------------------------------------------------------------------------------------------------------------------------------------------------------------------------------------------------------------------------------------------------------------------------|
| Sensitivity (HV)                               | 370                                                                                                                                                                                                                                                                                                                                  |
| Gain                                           | 0                                                                                                                                                                                                                                                                                                                                    |
| Offset                                         | 1                                                                                                                                                                                                                                                                                                                                    |
| Experimental conditions of laser intensity (%) | Intensity in the upper layer (depth = 15 $\mu\text{m}$ )<br>= $0.4 - 0.005 \times (\text{total thickness}/2 - 15 \mu\text{m})$<br>Intensity in the middle layer (total thickness /2) = 0.4<br>Intensity in the lower layer (latest depth = 15 $\mu\text{m}$ )<br>= $0.4 + 0.0266 \times (\text{total thickness}/2 + 15 \mu\text{m})$ |

---

**Conditions for the SYTO16 channel**Experimental conditions of imaging acquisition

|                                                |                                                                                                                                                                                                                                                                                                                                  |
|------------------------------------------------|----------------------------------------------------------------------------------------------------------------------------------------------------------------------------------------------------------------------------------------------------------------------------------------------------------------------------------|
| Sensitivity (HV)                               | 370                                                                                                                                                                                                                                                                                                                              |
| Gain                                           | 0                                                                                                                                                                                                                                                                                                                                |
| Offset                                         | 1                                                                                                                                                                                                                                                                                                                                |
| Experimental conditions of laser intensity (%) | Intensity in the upper layer (depth = 15 $\mu\text{m}$ )<br>= $0.8 - 0.0083 \times (\text{total thickness} - 15 \mu\text{m})$<br>Intensity in the middle layer (total thickness /2) = 0.8<br>Intensity in the lower layer (latest depth =15 $\mu\text{m}$ )<br>= $0.8 + 0.0333 \times (\text{total thickness} + 15 \mu\text{m})$ |

---

\*Laser intensity changed according to depth: the modification followed a fixed slope between the upper and the middle layers of the middle and lower layer; adjustments were performed using the Bright Z mode of the FV-3000 software.

\*Unit of measure for thickness =  $\mu\text{m}$
