# Supplementary material for: A novel computer-assisted tool for 3D imaging of programmed death-ligand 1 expression in immunofluorescence-stained and optically cleared breast cancer specimens
Source: Springer Nature journal article supplement (doi:10.1186/s12885-023-11748-8), 2024-01-24
Supplement: MOESM3 [file 26658192]

(A)

|                    | Tumor cell segmentation model | Immune cell segmentation model |
|--------------------|-------------------------------|--------------------------------|
| Total cases        | <b>18</b> with PD-L1 staining | <b>10</b> with CD45 staining   |
| Total images       | <b>40</b>                     | <b>38</b>                      |
| Total patches      | <b>52,239</b>                 | <b>67,491</b>                  |
| Training dataset   | <b>41,791</b> patches         | <b>53,993</b> patches          |
| Validation dataset | <b>5,224</b> patches          | <b>6,749</b> patches           |
| Testing dataset    | <b>5,224</b> patches          | <b>6,749</b> patches           |

(B)

|       |          | Model predictions |                   |                              |
|-------|----------|-------------------|-------------------|------------------------------|
|       |          | Positive          | Negative          |                              |
| Label | Positive | <b>34,450,252</b> | <b>10,320,260</b> | <b>Sensitivity</b><br>76.95% |
|       | Negative | <b>3,228,232</b>  | <b>37,591,252</b> | <b>Specificity</b><br>92.09% |
|       |          |                   |                   | <b>Accuracy</b><br>83.84%    |

The tumor cell segmentation showed an overall Dice score of 83.57%.

(C)

|       |          | Model predictions |                  |                              |
|-------|----------|-------------------|------------------|------------------------------|
|       |          | Positive          | Negative         |                              |
| Label | Positive | <b>9,562,615</b>  | <b>2516085</b>   | <b>Sensitivity</b><br>95.95% |
|       | Negative | <b>8,425,145</b>  | <b>129302952</b> | <b>Specificity</b><br>91.63% |
|       |          |                   |                  | <b>Accuracy</b><br>92.02%    |

The immune cell segmentation showed an overall Dice score of 68.42%.

(D)

| <b>Preparation of learning targets for the immune cell group</b>     |       |
|----------------------------------------------------------------------|-------|
| Kernel size of blurring (SYTO16)                                     | 1     |
| Kernel size of opening (SYTO16)                                      | 5     |
| Kernel size of closing (SYTO16)                                      | 3     |
| Kernel size of blurring (CD45)                                       | 5     |
| Kernel size of opening (CD45)                                        | 5     |
| Kernel size of closing (CD45)                                        | 1     |
| Distance parameter                                                   | 5     |
| Overlap proportion parameter                                         | 0.6   |
| <b>Post-processing of masks predicted by the segmentation models</b> |       |
| Upscaling ratio (tumor)                                              | 2     |
| Iterations of median blurring (tumor)                                | 2     |
| Downscaling ratio (tumor)                                            | 2     |
| Component size filtering (tumor)                                     | 12800 |
| Upscaling ratio (immune cells)                                       | 8     |
| Iterations of median blurring (immune cells)                         | 4     |
| Downscaling ratio (immune cells)                                     | 8     |
| Component size filtering (immune cells)                              | 100   |
| <b>Approximation of tumor area</b>                                   |       |
| Kernel size of dilation (immune cells)                               | 21    |
| Distance parameter                                                   | 1     |
| Overlap proportion parameter                                         | 0.2   |
| <b>Approximation of PD-L1 expression area</b>                        |       |
| Kernel size of blurring (SYTO16)                                     | 1     |
| Kernel size of opening (SYTO16)                                      | 5     |
| Kernel size of closing (SYTO16)                                      | 3     |
| Kernel size of blurring (SP142)                                      | 5     |
| Kernel size of opening (SP142)                                       | 1     |
| Kernel size of closing (SP142)                                       | 5     |
| Component size filtering (SP142)                                     | 256   |
| Distance parameter                                                   | 1     |
| Overlap proportion parameter                                         | 0.2   |

(E)

|          | <b>Accuracy</b> | <b>Sensitivity</b> | <b>Specificity</b> | <b>Dice score</b> |
|----------|-----------------|--------------------|--------------------|-------------------|
| Image 1  | 94.71%          | 74.27%             | 97.09%             | 74.54%            |
| Image 2  | 92.15%          | 91.65%             | 92.30%             | 84.66%            |
| Image 3  | 90.51%          | 73.82%             | 96.81%             | 80.27%            |
| Image 4  | 72.03%          | 61.20%             | 97.14%             | 75.36%            |
| Image 5  | 77.44%          | 79.39%             | 72.62%             | 83.37%            |
| Image 6  | 88.96%          | 44.08%             | 94.84%             | 48.07%            |
| Image 7  | 89.14%          | 61.28%             | 97.29%             | 71.86%            |
| Image 8  | 94.23%          | 88.34%             | 95.37%             | 83.30%            |
| Image 9  | 77.53%          | 90.91%             | 71.96%             | 70.41%            |
| Image 10 | 81.54%          | 91.60%             | 65.81%             | 85.83%            |
| Image 11 | 89.02%          | 92.02%             | 87.33%             | 85.80%            |
| Image 12 | 91.52%          | 86.18%             | 93.98%             | 86.50%            |
| Image 13 | 90.41%          | 82.34%             | 94.98%             | 86.13%            |
| Image 14 | 89.24%          | 68.23%             | 96.47%             | 75.99%            |
| Image 15 | 86.81%          | 79.69%             | 91.84%             | 81.00%            |
| Image 16 | 76.88%          | 69.99%             | 92.02%             | 80.55%            |
| Image 17 | 79.35%          | 77.17%             | 90.86%             | 86.22%            |
| Image 18 | 92.23%          | 80.83%             | 97.02%             | 86.02%            |
| Image 19 | 91.37%          | 86.30%             | 94.75%             | 88.90%            |
| Image 20 | 67.35%          | 53.38%             | 97.80%             | 69.15%            |
| Image 21 | 56.42%          | 42.76%             | 98.93%             | 59.76%            |
| Image 22 | 94.05%          | 94.70%             | 93.29%             | 94.51%            |
| Image 23 | 93.12%          | 95.79%             | 87.83%             | 94.88%            |
| Image 24 | 94.71%          | 74.27%             | 97.09%             | 74.54%            |
