# Supplementary material for: A novel computer-assisted tool for 3D imaging of programmed death-ligand 1 expression in immunofluorescence-stained and optically cleared breast cancer specimens
Source: Springer Nature journal article supplement (doi:10.1186/s12885-023-11748-8), 2024-01-24
Supplement: MOESM4 [file 26658192]

|                                            | Similarity between H&E/IHC and adjacent fluorescent images |                      | Similarity between the two pathologists on the same fluorescent image |
|--------------------------------------------|------------------------------------------------------------|----------------------|-----------------------------------------------------------------------|
|                                            | <u>Pathologist 1</u>                                       | <u>Pathologist 2</u> |                                                                       |
| DCIS<br>Present or not                     | 95%                                                        | 100%                 | 75%                                                                   |
| IDC<br>Present or not                      | 100%                                                       | 100%                 | 100%                                                                  |
| IC of PD-L1<br>(categorized as <1% or ≥1%) | 80%                                                        | 85%                  | 100%                                                                  |
