# Supplementary material for: A novel computer-assisted tool for 3D imaging of programmed death-ligand 1 expression in immunofluorescence-stained and optically cleared breast cancer specimens
Source: Springer Nature journal article supplement (doi:10.1186/s12885-023-11748-8), 2024-01-24
Supplement: MOESM5 [file 26658192]

(A)

|       |                         | Model predictions       |                      |                             |
|-------|-------------------------|-------------------------|----------------------|-----------------------------|
|       |                         | Positive ( $\geq 1\%$ ) | Negative ( $< 1\%$ ) |                             |
| Label | Positive ( $\geq 1\%$ ) | 10 cases                | 2 cases              | <b>Sensitivity</b><br>83.3% |
|       | Negative ( $< 1\%$ )    | 0 cases                 | 8 cases              | <b>Specificity</b><br>100%  |
|       |                         |                         |                      | <b>Accuracy</b><br>90.0%    |

(B)

| Case ID | Pathological diagnosis | Computer-assisted prediction algorithm |
|---------|------------------------|----------------------------------------|
| Case 1  | Equal or above 1%      | Equal or above 1%                      |
| Case 2  | Equal or above 1%      | Equal or above 1%                      |
| Case 3  | Equal or above 1%      | Equal or above 1%                      |
| Case 4  | Below 1%               | Below 1%                               |
| Case 5  | Below 1%               | Below 1%                               |
| Case 6  | Equal or above 1%      | Equal or above 1%                      |
| Case 7  | 0%                     | 0%                                     |
| Case 8  | 0%                     | 0%                                     |
| Case 9  | Below 1%               | Below 1%                               |
| Case 10 | Equal or above 1%      | Equal or above 1%                      |
| Case 11 | Equal or above 1%      | Equal or above 1%                      |
| Case 12 | Equal or above 1%      | Equal or above 1%                      |
| Case 13 | Equal or above 1%      | Below 1%                               |
| Case 14 | Equal or above 1%      | Below 1%                               |
| Case 15 | Equal or above 1%      | Equal or above 1%                      |
| Case 16 | Equal or above 1%      | Equal or above 1%                      |
| Case 17 | Equal or above 1%      | Equal or above 1%                      |
| Case 18 | Below 1%               | Below 1%                               |
| Case 19 | 0%                     | 0%                                     |
| Case 20 | 0%                     | 0%                                     |
